# Supplementary material for: MoO3-modified SAPO-34 for photocatalytic nonoxidative coupling of methane
Source: Royal Society of Chemistry journal article supplement (doi:10.1039/d2cy00502f), 2022-01-01
Supplement: d2cy00502f1.pdf [file d2cy00502f1.pdf]

## **MoO<sub>3</sub>-modified SAPO-34 for Photocatalytic Nonoxidative Coupling of Methane**

Lihan Pan†, Shiqun Wu†, Zhan Huang†, Shengwei Zhang†, Lingzhi Wang†,\* , Jinlong Zhang†,\*

†Key Lab for Advanced Materials and Joint International Research Laboratory of Precision Chemistry and Molecular Engineering, Feringa Nobel Prize Scientist Joint Research Center, Shanghai Engineering Research Center for Multi-Media Environmental Catalysis and Resource Utilization, Institute of Fine Chemicals, School of Chemistry and Molecular Engineering, East China University of Science & Technology, 130 Meilong Road, Shanghai, 200237, China

**Table S1.** Elemental analysis of the catalysts.<sup>[a]</sup>

| Samples        | Mo (wt%) |
|----------------|----------|
| 1% Mo/SAPO-34  | 0.74     |
| 2% Mo/SAPO-34  | 1.1      |
| 5% Mo/SAPO-34  | 2.6      |
| 10% Mo/SAPO-34 | 6.1      |

[a] Analyzed by the ICP-AES method.

**Table S2.** Results of various samples in different temperature for photo-driven methane NOCM conversion.<sup>[a]</sup>

| Entry            | Samples          | Reaction Temperature | Conversion<br>[CH <sub>4</sub> (%)] | Yield (μmol)                  |                | Rate<br>(μmol g <sup>-1</sup> h <sup>-1</sup> ) | Selectivity<br>[C <sub>2</sub> H <sub>6</sub> (%)] |
|------------------|------------------|----------------------|-------------------------------------|-------------------------------|----------------|-------------------------------------------------|----------------------------------------------------|
|                  |                  |                      |                                     | C <sub>2</sub> H <sub>6</sub> | H <sub>2</sub> |                                                 |                                                    |
| 1                | SAPO-34          | 298 K                | 0.684                               | 0.1680                        | 2.3094         | 0.3490                                          | 97.45                                              |
| 2                | 1%Mo/SAPO-34     | 298 K                | 0.949                               | 0.2263                        | 3.3150         | 0.4841                                          | 93.15                                              |
| 3                | 2%Mo/SAPO-34     | 298 K                | 1.758                               | 0.4279                        | 2.2821         | 0.8962                                          | 97.10                                              |
| 4                | 5%Mo/SAPO-34     | 298 K                | 1.764                               | 0.4498                        | 1.4998         | 0.8997                                          | 100                                                |
| 5                | 10%Mo/SAPO-34    | 298 K                | 0.694                               | 0.1769                        | 0.1561         | 0.3537                                          | 100                                                |
| 6                | MoO <sub>3</sub> | 298 K                | 0                                   | 0                             | 0              | 0                                               | 0                                                  |
| 7 <sup>[b]</sup> | 5%Mo/SAPO-34     | 373 K                | 3.282                               | 0.7139                        | 4.3769         | 1.6740                                          | 90.12                                              |
| 8 <sup>[c]</sup> | 5%Mo/SAPO-34     | 473 K                | 8.038                               | 1.7563                        | 6.1838         | 4.1004                                          | 90.38                                              |

[a] Reaction conditions were as follows: samples, 0.2 g; reaction time, 4 h; reactant, 44.6 μmol of methane; light source, 300 W Xe lamp; reaction temperature, 298 K; quartz reactor, 45 cm<sup>3</sup>. The products were collected directly, then analyzed by gas chromatography with flame-ionization and thermal conductivity detector. [b] Reaction conditions are the same as others, except the reaction temperature is 373 K. [c] Reaction conditions are the same as others, except the reaction temperature is 473 K.

**Table S3.** Representative works on photocatalytic or thermocatalytic non-oxidative reaction of methane.

| Samples                                                                                                 | Conditions                                                                                                               | Rate of methane                           | Main Products                               | References |
|---------------------------------------------------------------------------------------------------------|--------------------------------------------------------------------------------------------------------------------------|-------------------------------------------|---------------------------------------------|------------|
| (Zn <sup>+</sup> ,Zn <sup>2+</sup> )-ZSM-5-                                                             | 150 W high-pressure Hg lamp for 8 h;<br>1 g sample; 200 $\mu\text{mol CH}_4$                                             | 9.80 $\mu\text{mol g}^{-1} \text{h}^{-1}$ | Ethane<br>(C <sub>2</sub> H <sub>6</sub> )  | 1          |
| Au/m-ZnO-4.8                                                                                            | 300 W Xe lamp for 4 h; 1 mg sample;<br>22.3 $\mu\text{mol CH}_4$                                                         | 23.5 $\mu\text{mol g}^{-1} \text{h}^{-1}$ | Ethane<br>(C <sub>2</sub> H <sub>6</sub> )  | 2          |
| Ga-ETS-10-0.2                                                                                           | 150 W high-pressure Hg lamp for 5 h;<br>0.2 g sample; 200 $\mu\text{mol CH}_4$                                           | 29.8 $\mu\text{mol g}^{-1} \text{h}^{-1}$ | Ethane<br>(C <sub>2</sub> H <sub>6</sub> )  | 3          |
| Ga <sub>2</sub> O <sub>3</sub> -K                                                                       | 300-W Xe lamp for 3 h, 0.2 g sample;<br>200 $\mu\text{mol CH}_4$                                                         | 0.17%                                     | Ethane<br>(C <sub>2</sub> H <sub>6</sub> )  | 4          |
| Pt/HGTS (2%)                                                                                            | 300 W Xe lamp for 4 h;<br>0.2 g sample; 44.6 $\mu\text{mol CH}_4$                                                        | 3.48 $\mu\text{mol g}^{-1} \text{h}^{-1}$ | Ethane<br>(C <sub>2</sub> H <sub>6</sub> )  | 5          |
| SiO <sub>2</sub> -Al <sub>2</sub> O <sub>3</sub>                                                        | 250 W Xe lamp for 18 h; 1.0 g sample;<br>100 $\mu\text{mol CH}_4$                                                        | 0.33 $\mu\text{mol g}^{-1} \text{h}^{-1}$ | Ethane<br>(C <sub>2</sub> H <sub>6</sub> )  | 6          |
| SiO <sub>2</sub> -Al <sub>2</sub> O <sub>3</sub> -TiO <sub>2</sub> (0.5 mol % of Ti and 10 mol % of Al) | 250 W Xe lamp for 6 h; 1.0 g sample;<br>200 $\mu\text{mol CH}_4$                                                         | 1.47 $\mu\text{mol g}^{-1} \text{h}^{-1}$ | Ethane<br>(C <sub>2</sub> H <sub>6</sub> )  | 7          |
| 0.5% Fe@SiO <sub>2</sub>                                                                                | 1223 K; fixed-bed microreactor; 90 volume percent (vol %) CH <sub>4</sub> /N <sub>2</sub>                                | 48%                                       | 53% ethene;<br>25% naphthalene; 22% benzene | 8          |
| PdS/ZrO <sub>2</sub>                                                                                    | 0.5 g sample; 1323 K; flow reactor; 5% CH <sub>4</sub> /Ar mixture gas;                                                  | 18%                                       | ethylene selectivity near 20%               | 9          |
| 5%Mo/ZSM-5/1                                                                                            | 0.5 g sample; 973 K for 4h; fixed bed flow quartz; 3600 mL/h g methane                                                   | 11.3%                                     | Benzene (70%)                               | 10         |
| 5%Mo/MCM-22                                                                                             | 0.5 g sample; 973 K for 4h; fixed bed flow quartz; 3600 mL/h g methane                                                   | 6%                                        | Benzene (60%)                               | 10         |
| im-Mo/HZSM-5(H)                                                                                         | 0.2 g sample; 973 K; fixed bed flow quartz; 1500 mL/h g 10% N <sub>2</sub> /CH <sub>4</sub>                              | 2.4 $\mu\text{mol g}^{-1} \text{s}^{-1}$  | BTX(benzene, toluene, and xylene) (80%)     | 11         |
| Fe(5)-Zr(1)-ZSM-5                                                                                       | 0.2 g sample; 1023 K for 6h; fixed-bed tubular quartz reactor; 100 sccm of N <sub>2</sub> /CH <sub>4</sub> 90:10 mixture | 1.9%                                      | Benzene (48%)<br>Coke (35.3%)               | 12         |
| Fe(5)-Mo(1)-ZSM-5                                                                                       | 0.2 g sample; 1023 K for 6h; fixed-bed tubular quartz reactor; 100 sccm of N <sub>2</sub> /CH <sub>4</sub> 90:10 mixture | 0.0%                                      | Benzene (4%)<br>Coke (95.3%)                | 12         |
| 10%Mo/HMFI-B                                                                                            | 1 g sample; 973 K; fixed bed continuous plug-flow microreactor;                                                          | 7%                                        | Benzene and naphthalene                     | 13         |
| 4.7%Mo/lamellar MWW                                                                                     | 0.3g sample; 983 K; fixed bed reactor; 1600 mL gcat-1 h-1 methane                                                        | 11%                                       | Benzene (90%)                               | 14         |
| 3%Mo/Al <sub>2</sub> O <sub>3</sub>                                                                     | 0.3g sample; 973 K; quartz reactor;                                                                                      | 7.4%                                      | Benzene (4%)                                | 15         |

|               |                                      |                                           |                                  |      |
|---------------|--------------------------------------|-------------------------------------------|----------------------------------|------|
|               | 1440 mL/g h methane                  |                                           | C <sub>2</sub> (2.1%)            |      |
|               |                                      |                                           | Coke (88.9%)                     |      |
|               | 1.0g sample; 923 K; fixed-bed        |                                           | Benzene (72.9)                   | 16   |
| 3%Mo/HSAPO-34 | continuous-flow quartz microreactor; | 0.6%                                      | C <sub>2</sub> (10.1)            |      |
|               | 1600 mL/g h methane                  |                                           |                                  |      |
| Mo/SAPO-34    | 300 W Xe lamp for 4 h; 0.2 g sample; | 8.04%                                     | Ethane                           | This |
|               | 44.6 μmol CH <sub>4</sub> 473K       | 4.10 μmol g <sup>-1</sup> h <sup>-1</sup> | (C <sub>2</sub> H <sub>6</sub> ) | work |

**Table S4.** The Mo<sup>5+</sup>/Mo<sup>6+</sup> and Mo<sup>5+</sup>/(Mo<sup>5+</sup>+Mo<sup>6+</sup>) with the different loading.<sup>[a]</sup>

| Samples        | Mo <sup>5+</sup> /Mo <sup>6+</sup> | Mo <sup>5+</sup> /(Mo <sup>5+</sup> +Mo <sup>6+</sup> ) |
|----------------|------------------------------------|---------------------------------------------------------|
| 1% Mo/SAPO-34  | 0.406                              | 0.278                                                   |
| 2% Mo/SAPO-34  | 0.614                              | 0.381                                                   |
| 5% Mo/SAPO-34  | 0.577                              | 0.366                                                   |
| 10% Mo/SAPO-34 | 0.427                              | 0.299                                                   |

[a] The ratio of the Mo<sup>5+</sup> and Mo<sup>6+</sup> was calculated by area ratio, which denotes the integration of corresponding peaks of XPS date.

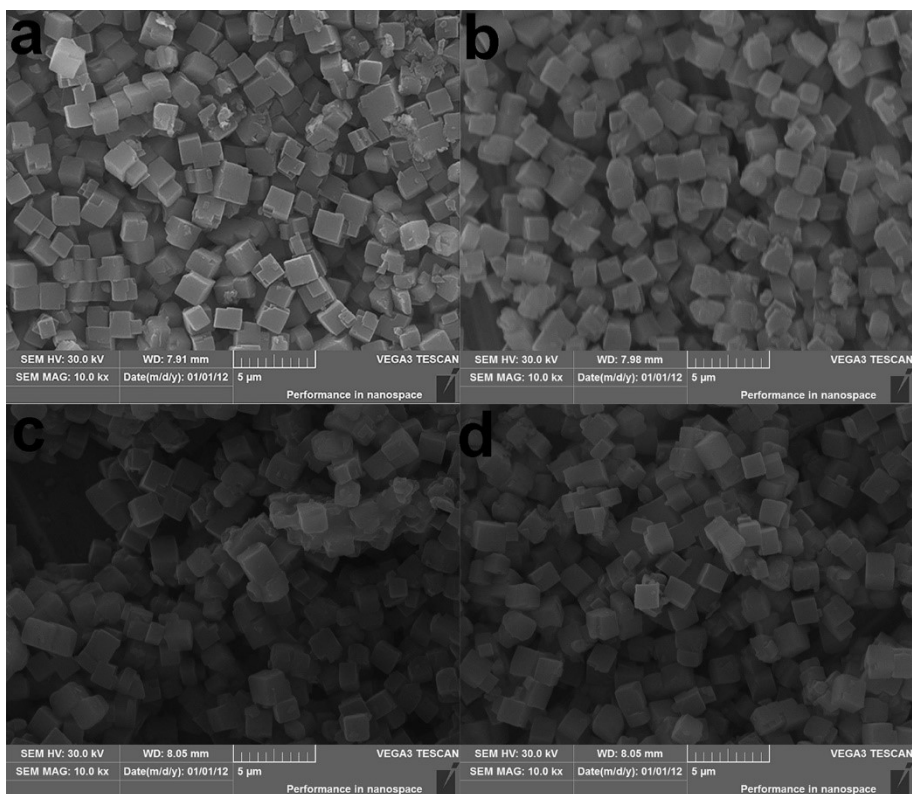

**Figure S1.** SEM images of (a) SAPO-34, (b) 1% Mo/SAPO-34, (c) 2% Mo/SAPO-34 and (d) 5% Mo/SAPO-34.

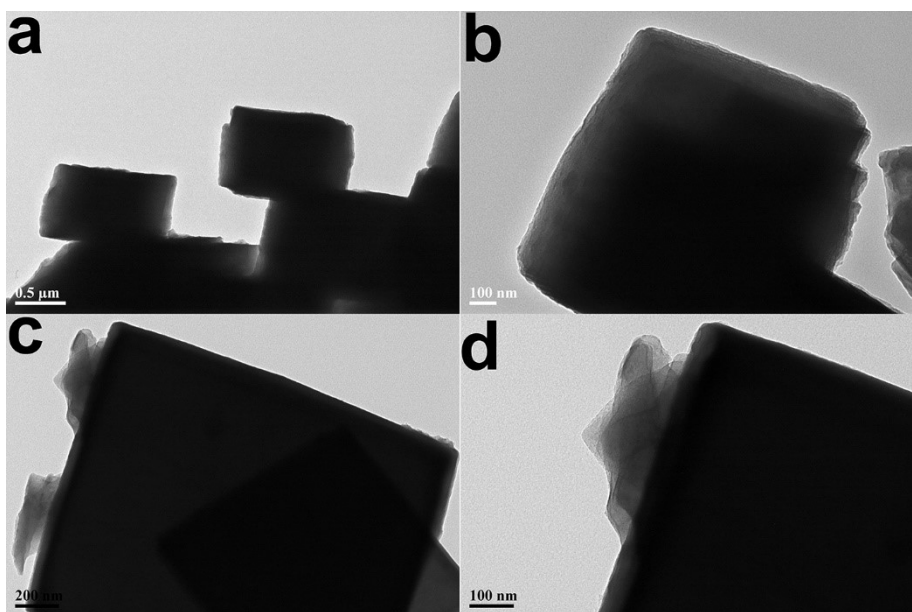

**Figure S2.** TEM images of 1% Mo/SAPO-34 with different scale bar: (a) 500 nm and (b) 100 nm; 5% Mo/SAPO-34 with different scale bar: (c) 200 nm and (d) 100 nm.

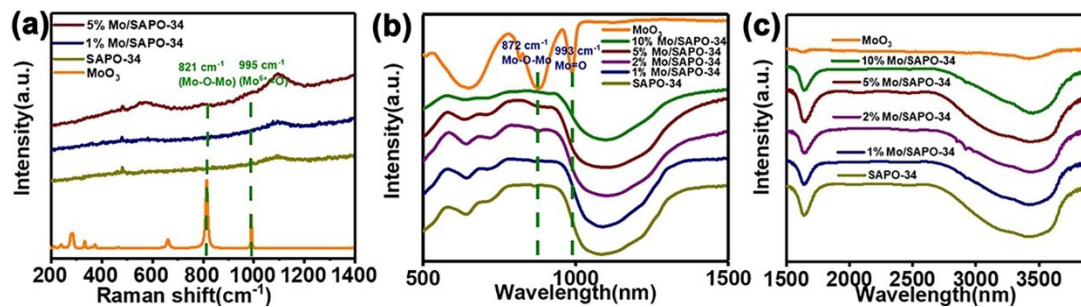

Figure S3. (a) The Raman spectrum, (b) and (c) FTIR spectra of SAPO-34, Mo-SAPO-34 (1%, 2%, 5%, 10%) and MoO<sub>3</sub>, respectively.

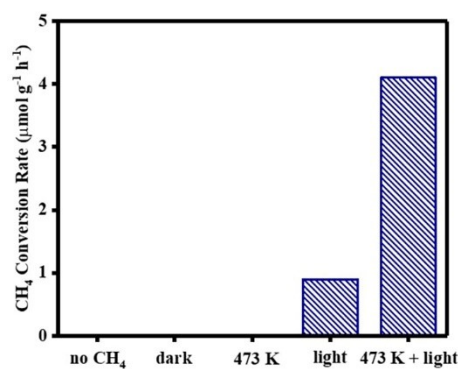

Figure S4. Comparison of experiment condition. The detected conversion of methane with different reaction conditions, conditions from left to right: 0.2 g catalyst with Xe lamp irradiation in a vacuum; 0.2 g catalyst and 1 mL methane without light; 0.2 g catalyst and 1 mL methane heating at 473 K without light for 4 h; 0.2 g catalyst and 1 mL methane with Xe lamp irradiation for 4 h; 0.2 g catalyst and 1 mL methane heating at 473 K with Xe lamp irradiation for 4 h.

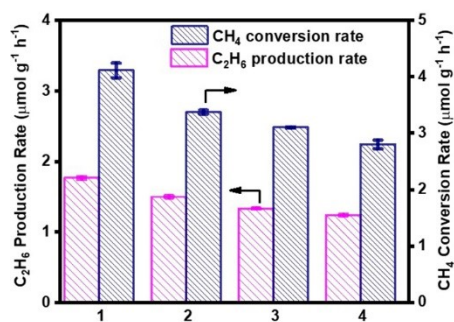

Figure S5. The cycle experiments of Mo/SAPO-34 (5%).

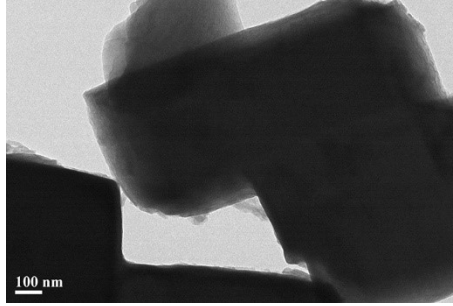

Figure S6. TEM images of recycle 5% Mo/SAPO-34.

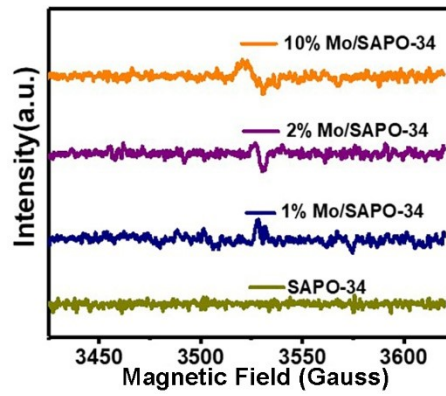

Figure S7. The EPR results of different Mo content of SAPO-34 (0%, 1%, 2% 10%).

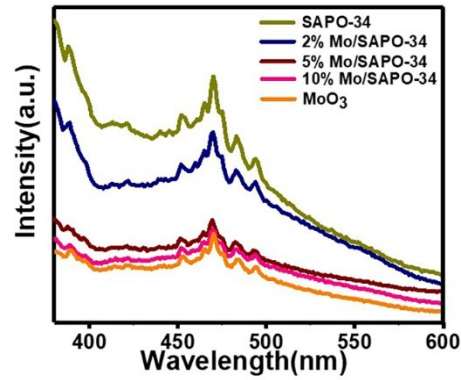

Figure S8. Room-temperature photoluminescence (PL) emission spectra of different samples.

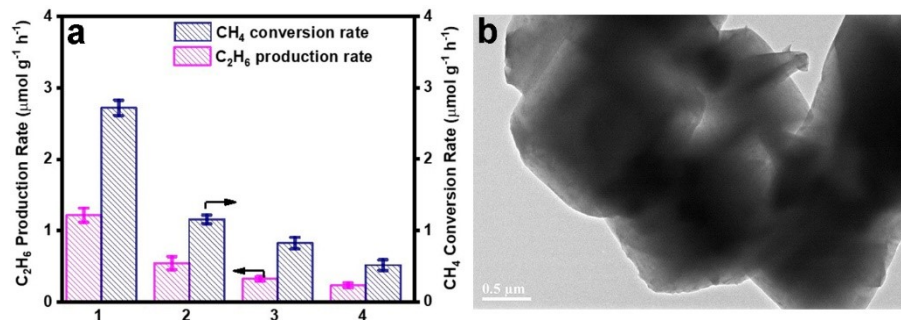

Figure S9. (a) The recycle experiments of 2% Mo/SAPO-34; (b) TEM images of recycle 2% Mo/SAPO-34.

## References:

- [1] Li, L.; Li, G. D.; Yan, C.; Mu, X. Y.; Pan, X. L.; Zou, X. X.; Wang, K. X.; Chen, J. S. Efficient Sunlight-Driven Dehydrogenative Coupling of Methane to Ethane over a Zn<sup>+</sup>-Modified Zeolite. *Angew. Chem. Int. Ed.* **2011**, *50*, 8299-8303.
- [2] Meng, L.; Chen, Z.; Ma, Z.; He, S.; Hou, Y.; Li, H.; Yuan, R.; Huang, X.; Wang, X.; Wang, X.; Long, J. Gold Plasmon-induced Photocatalytic Dehydrogenative Coupling of Methane to Ethane on Polar Oxide Surfaces. *Energy Environ. Sci.* **2018**, *11*, 294-298.
- [3] Li, L.; Cai, Y. Y.; Li, G. D.; Mu, X. Y.; Wang, K. X.; Chen, J. S. Synergistic Effect on the Photoactivation of the Methane C-H Bond over Ga<sup>3+</sup>-Modified ETS-10. *Angew. Chem. Int. Ed.* **2012**, *51*, 4702-4706.
- [4] Yuliati, L.; Hattori, T.; Itoh, H.; Yoshida, H., Photocatalytic nonoxidative coupling of methane on gallium oxide and silica-supported gallium oxide. *Journal of Catalysis* **2008**, *257* (2), 396-402.
- [5] Wu, S.; Tan, X.; Lei, J.; Chen, H.; Wang, L.; Zhang, J., Ga-Doped and Pt-Loaded Porous TiO<sub>2</sub>-SiO<sub>2</sub> for Photocatalytic Nonoxidative Coupling of Methane. *Journal of the American Chemical Society* **2019**, *141* (16), 6592-6600.
- [6] Kato, Y.; Yoshida, H.; Hattori, T. Photoinduced Non-oxidative Coupling of Methane over Silica-alumina and Alumina Around Room Temperature. *Chem. Commun.* **1998**, *21*, 2389-2390.
- [7] Yoshida, H.; Matsushita, N.; Kato, Y.; Hattori, T. Synergistic Active Sites on SiO<sub>2</sub>-Al<sub>2</sub>O<sub>3</sub>-TiO<sub>2</sub> Photocatalysts for Direct Methane Coupling. *J. Phys. Chem. B.* **2003**, *107*, 8355-8362.
- [8] Guo, X.; Fang, G.; Li, G.; Ma, H.; Fan, H.; Yu, L.; Ma, C.; Wu, X.; Deng, D.; Wei, M.; Tan, D.; Si, R.; Zhang, S.; Li, J.; Sun, L.; Tang, Z.; Pan, X.; Bao, X., Direct, Nonoxidative Conversion of Methane to Ethylene, Aromatics, and Hydrogen. *Science* **2014**, *344* (6184), 616.
- [9] Zhu, Q.; Wegener, S. L.; Xie, C.; Uche, O.; Neurock, M.; Marks, T. J., Sulfur as a selective 'soft' oxidant for catalytic methane conversion probed by experiment and theory. *Nature Chemistry* **2013**, *5* (2), 104-109.
- [10] Smiešková, A.; Hudec, P.; Kumar, N.; Salmi, T.; Murzin, D. Y.; Jorík, V., Aromatization of methane on Mo modified zeolites: Influence of the surface and structural properties of the carriers. *Applied Catalysis A: General* **2010**, *377* (1), 83-91
- [11] Liu, H.; Bao, X.; Xu, Y., Methane dehydroaromatization under nonoxidative conditions over Mo/HZSM-5 catalysts: Identification and preparation of the Mo active species. *Journal of Catalysis* **2006**, *239* (2), 441-450.
- [12] Denardin, F. G.; Perez-Lopez, O. W., Methane dehydroaromatization over Fe-M/ZSM-5 catalysts (M= Zr, Nb, Mo). *Microporous and Mesoporous Materials* **2020**, *295*, 109961.
- [13] Derouane-Abd Hamid, S. B.; Anderson, J. R.; Schmidt, I.; Bouchy, C.; Jacobsen, C. J. H.; Derouane, E. G., Effect of the activation procedure on the performance of Mo/H-MFI catalysts for the non-oxidative conversion of methane to aromatics. *Catalysis Today* **2000**, *63* (2), 461-469.
- [14] Wu, Y.; Emdadi, L.; Wang, Z.; Fan, W.; Liu, D., Textural and catalytic properties of Mo loaded hierarchical meso-/microporous lamellar MFI and MWW zeolites for direct methane conversion. *Applied Catalysis A: General* **2014**, *470*, 344-354.
- [15] Liu, S.; Wang, L.; Ohnishi, R.; Ichikawa, M., Bifunctional Catalysis of Mo/HZSM-5 in the Dehydroaromatization of Methane to Benzene and Naphthalene XAFS/TG/DTA/MASS/FTIR Characterization and Supporting Effects. *Journal of Catalysis* **1999**, *181* (2), 175-188.
- [16] Zhang, C.-L.; Li, S.; Yuan, Y.; Zhang, W.; Wu, T.-H.; Lin, L.-W., Aromatization of methane in the absence of oxygen over Mo-based catalysts supported on different types of zeolites. *Catalysis Letters* **1998**, *56*, 207-
